# Supplementary material
Source: PubMed Central journal article supplement (PMC4938196)

Supplemental Fig. 1: Rco1 dimerization is independent of its PHD fingers. (A) Co-immunoprecipitation of endogenous Rco1-TAP with either wild-type or PHD mutant Rco1-HA constructs. Mutation of either PHD finger does not affect Rco1 dimerization.

Supplemental Fig. 2: Chromatin structure is aberrant in PHD2 mutants. (A) Cryptic initiation spotting assay using the *STE11-HIS3* fusion gene reporter. The indicated strains are spotted in a 5-fold serial dilution from saturated culture. Plates are imaged after 2-5 days.

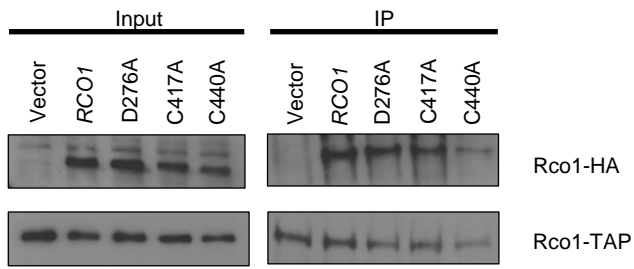

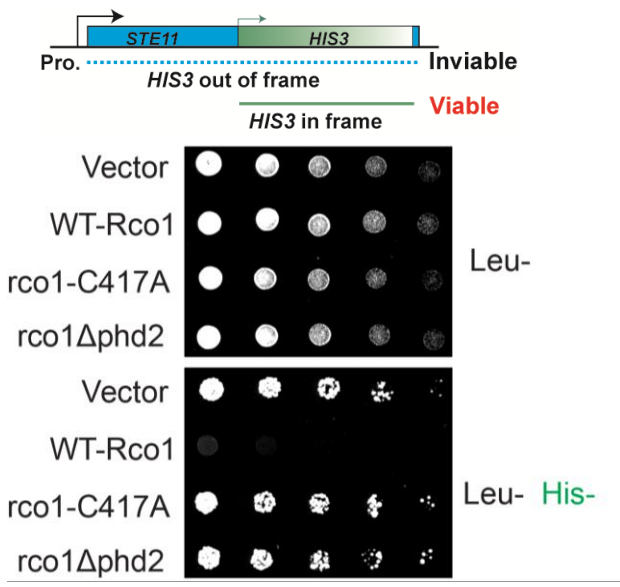

Supplement: supp_M116.720193_McDanieletal_Suppdata.pdf [file supp_M116.720193_McDanieletal_Suppdata.pdf]
