# Supplementary material
Source: PubMed Central journal article supplement (PMC4938196)
Supplement: supp_M116.720193_tables.pdf [file supp_M116.720193_tables.pdf]

Table 1: McDaniel et al.

| <b>Table 1. Strains Used in this Study</b> |                                           |                                                                                                                                                                                                            |                     |
|--------------------------------------------|-------------------------------------------|------------------------------------------------------------------------------------------------------------------------------------------------------------------------------------------------------------|---------------------|
| <b>Name</b>                                | <b>Description</b>                        | <b>Genotype</b>                                                                                                                                                                                            | <b>Reference</b>    |
| YSM080                                     | $\Delta rco1$                             | MATa his3 $\Delta$ 1 leu2 $\Delta$ 0 met15 $\Delta$ 0 ura3 $\Delta$ 0 Rco1 $\Delta$ ::KanMX                                                                                                                | This study          |
| KLY78                                      | WT Flo8 Cryptic Reporter Strain           | MAT $\alpha$ , ura3-52, leu2 $\Delta$ 1, trp1 $\Delta$ 63, his3 $\Delta$ 200, lys2-128 $\delta$ , KanMX4::GAL1pr-flo8::HIS3 (flo8 $\Delta$ (+1729-2505)::HIS3 (+1-663))                                    | Silva et al. 2012   |
| YSM127                                     | KLY78, Rco1 $\Delta$                      | MAT $\alpha$ , ura3-52, leu2 $\Delta$ 1, trp1 $\Delta$ 63, his3 $\Delta$ 200, lys2-128 $\delta$ , KanMX4::GAL1pr-flo8::HIS3 (flo8 $\Delta$ (+1729-2505)::HIS3 (+1-663)) rco1 $\Delta$ ::Nat                | This study          |
| BY4741                                     | WT                                        | MATa his3 $\Delta$ 1 leu $\Delta$ 0 met15 $\Delta$ 0 ura3 $\Delta$ 0                                                                                                                                       |                     |
| YSB787                                     | Bur1 Shuffle                              | MATa ura3-52 leu2 $\Delta$ 1 trp1 $\Delta$ 63 his3 $\Delta$ 200 bur1 $\Delta$ ::HIS3 lys2 $\Delta$ 202 [pRS316-BUR1]                                                                                       | Keogh et al., 2003. |
| YSB1849                                    | Bur1 Shuffle rco1 $\Delta$                | MATa bur1 $\Delta$ ::HIS3 rco1 $\Delta$ ::KanMX ura3-52 leu2 $\Delta$ 1 trp1 $\Delta$ 63 his3 $\Delta$ 200 lys2 $\Delta$ 202 [pRS316-BUR1]                                                                 | Keogh et al., 2005. |
| YSB1003                                    | Bur1 Shuffle set2 $\Delta$                | MAT $\alpha$ , bur1 $\Delta$ ::HIS3, set2 $\Delta$ ::KanMX, ura3-52 or 3 $\Delta$ 0, leu2 $\Delta$ 1 or 2 $\Delta$ 0, trp1 $\Delta$ 63, his3 $\Delta$ 200 or 3 $\Delta$ 1, lys2 $\Delta$ 202 (pRS316-BUR1) | Keogh et al., 2005. |
| YCR239                                     | STE11-HIS3 reporter strain, rco1 $\Delta$ | MATa, his3 $\Delta$ 1 leu2 $\Delta$ 0 met15 $\Delta$ 0 ura3 $\Delta$ 0 RCO1 $\Delta$ ::KANMX6 STE11-1870::HIS3                                                                                             | Ruan 2015           |

Table 2: McDaniel et al.

| <b>Table S2: Plasmids Used in This Study</b> |                                |                   |
|----------------------------------------------|--------------------------------|-------------------|
| <b>Name</b>                                  | <b>Features</b>                | <b>Source</b>     |
| pRS415                                       | Empty Vector                   |                   |
| pRS415-Rco1                                  | Rco1-3XHA                      | This study        |
| pRS415-Rco1-C275A                            | Rco1-C275A-3XHA                | This study        |
| pRS415-Rco1-D276A                            | Rco1-D276A-3XHA                | This study        |
| pRS415-Rco1-H283A                            | Rco1-H283A-3XHA                | This study        |
| pRS415-Rco1-C417A                            | Rco1-C417A-3XHA                | This study        |
| pRS415-Rco1-M438W                            | Rco1-M438W-3XHA                | This study        |
| pRS415-Rco1-C440A                            | Rco1-C440A-3XHA                | This study        |
| pRS415-Rco1-D441A                            | Rco1-D441A-3XHA                | This study        |
| pBL1253                                      | pRS415 Rco1pro Flag-Rco1WT     | Ruan et al., 2015 |
| pCR864                                       | pRS415-Rco1pro-Flag-Rco1phd2Δ  | This study        |
| pCR863                                       | pRS415-Rco1pro-Flag-Rco1-C417A | This study        |
| pBL451                                       | pRET-GST-Rco1-PHD1             | This study        |
| Rco1-PHD2                                    | pGEXT4T1-Rco1-PHD2             | This study        |

Table 3: McDaniel et al.

| Table 3. Histone peptides used in this study |                       |                                                                                                                                                   |
|----------------------------------------------|-----------------------|---------------------------------------------------------------------------------------------------------------------------------------------------|
| Tag                                          | Name                  | Sequence                                                                                                                                          |
| Biotin                                       | H3 (1-20)             | AR <sup>2</sup> TK <sup>4</sup> QTAR <sup>8</sup> K <sup>9</sup> S <sup>10</sup> TGGK <sup>14</sup> APRK <sup>18</sup> QL-K(Biot)-NH <sub>2</sub> |
| Biotin                                       | H3 (1-20)<br>H3K4me3  | ARTK(Me <sub>3</sub> )QTARKS <sup>10</sup> TGGKAPRKQL-K(Biot)-NH <sub>2</sub>                                                                     |
| Biotin                                       | H3(27-45)             | KSAPSTGGVKKPHRYKPGT-GG-K(Biot)-NH <sub>2</sub>                                                                                                    |
| Biotin                                       | H3(27-45)<br>H3K36me2 | KSAPSTGGVK(Me <sub>2</sub> )KPHRYKPGT-GG-K(Biot)-NH <sub>2</sub>                                                                                  |
| Biotin                                       | H3(27-45)<br>H3K36me3 | KSAPSTGGVK(Me <sub>3</sub> )KPHRYKPGT-G-K(Biot)-NH <sub>2</sub>                                                                                   |
